# Supplementary material
Source: PubMed Central journal article supplement (PMC9888363)
Supplement: NIHMS1864594-supplement-Supplementary_figures.pdf [file NIHMS1864594-supplement-Supplementary_figures.pdf]

Supplementary Figure 1: Uncropped blots

Figure 3b

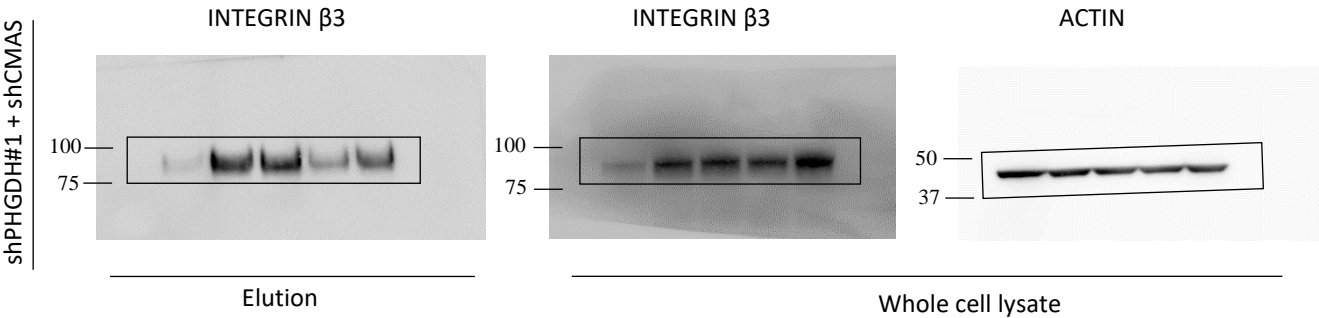

Figure 4b

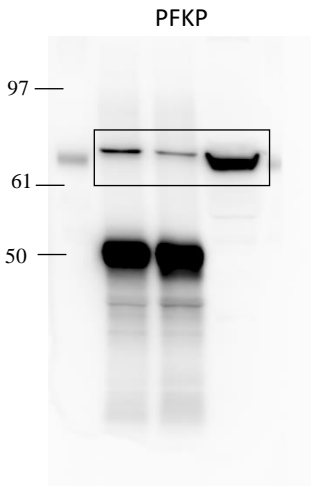

Extended Data Figure 2a

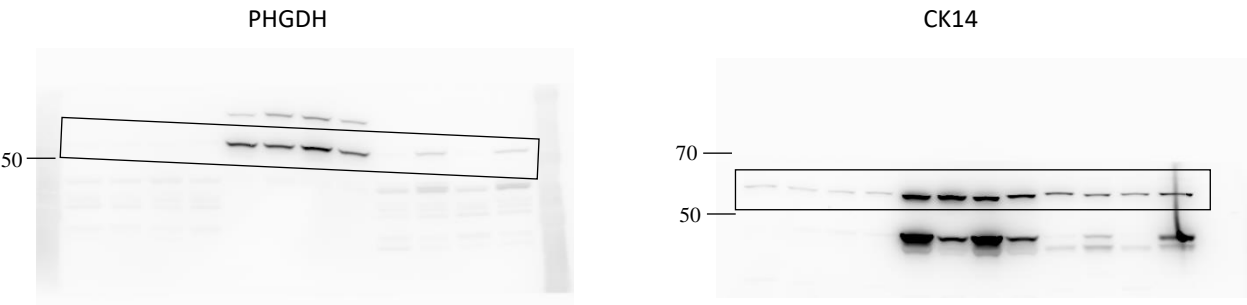

Extended Data Figure 2b

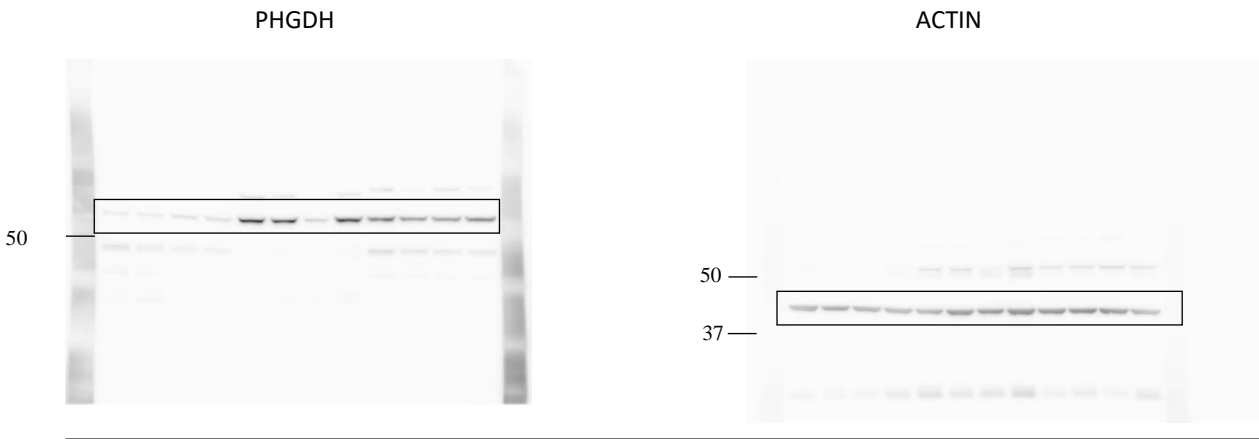

Extended Data Figure 2c

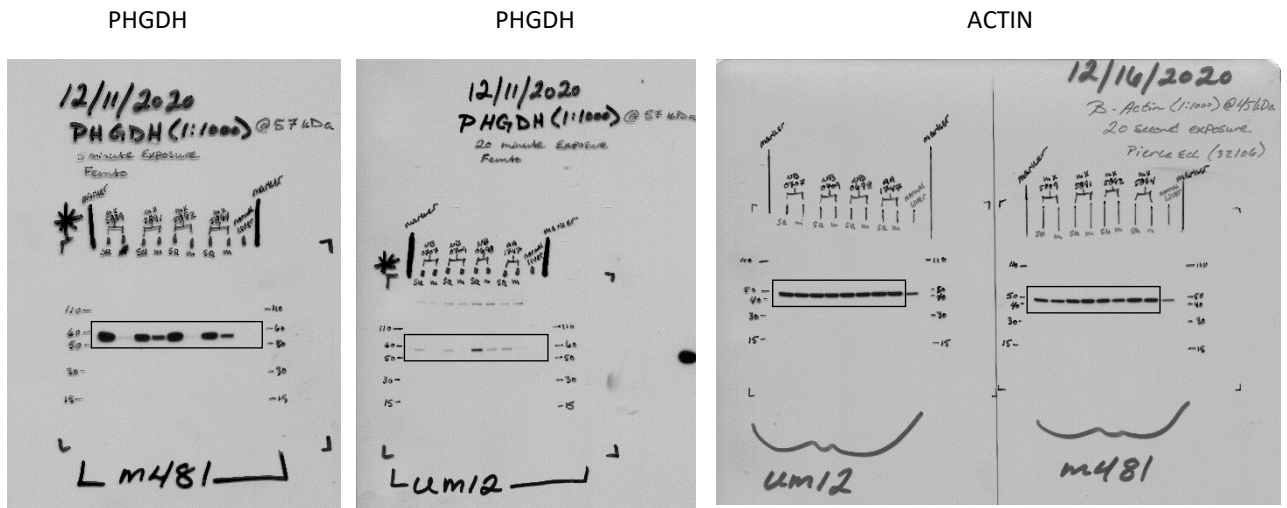

Extended Data Figure 2g

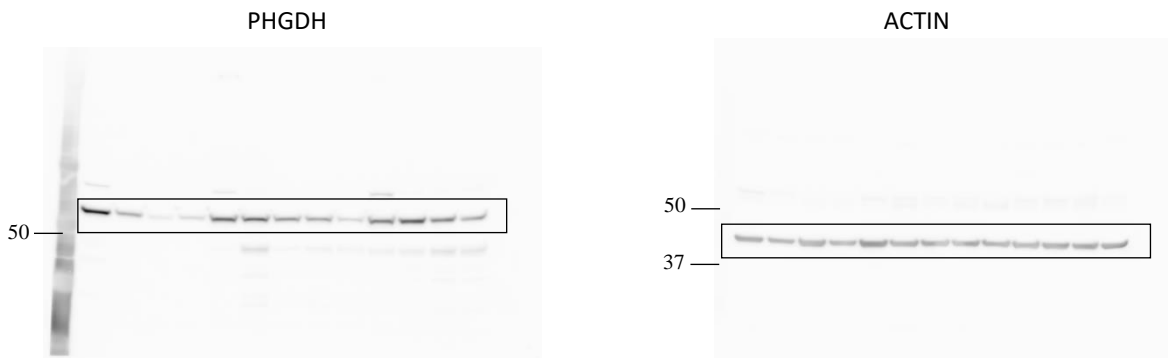

Extended Data Figure 2i

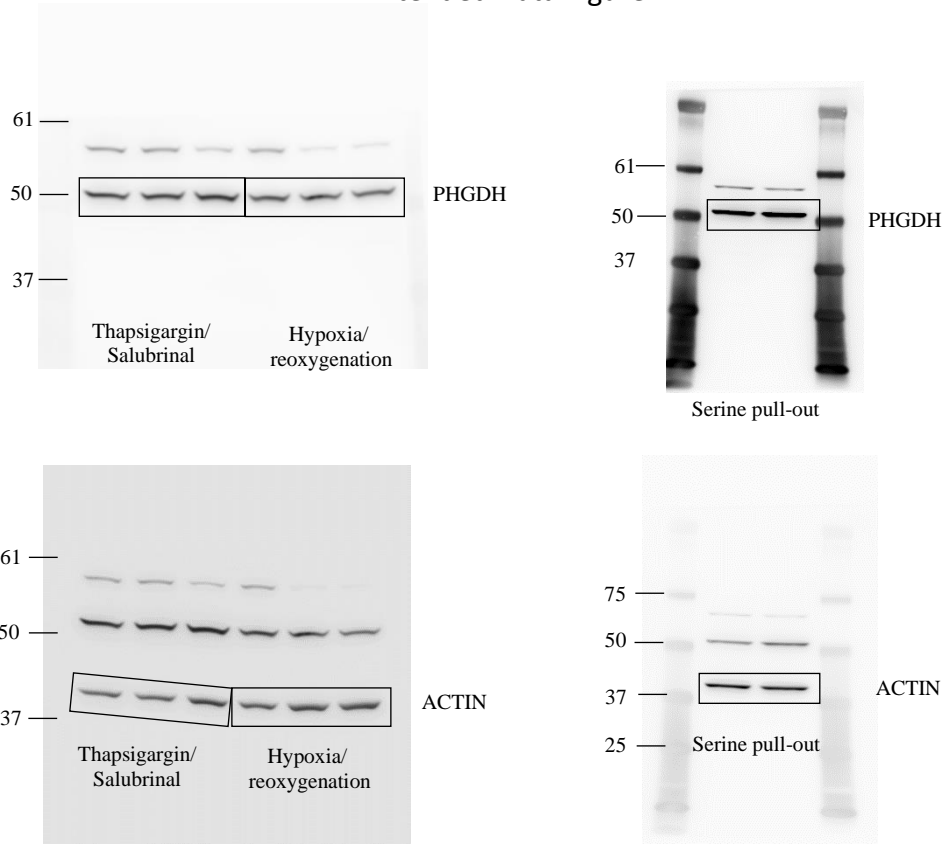

Extended Data Figure 4d

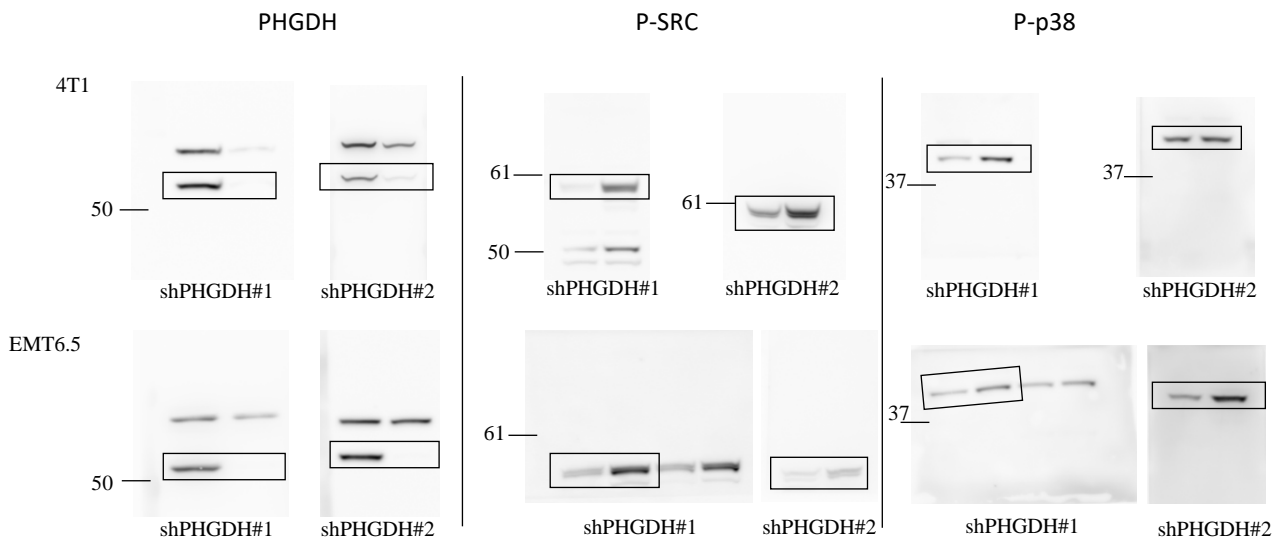

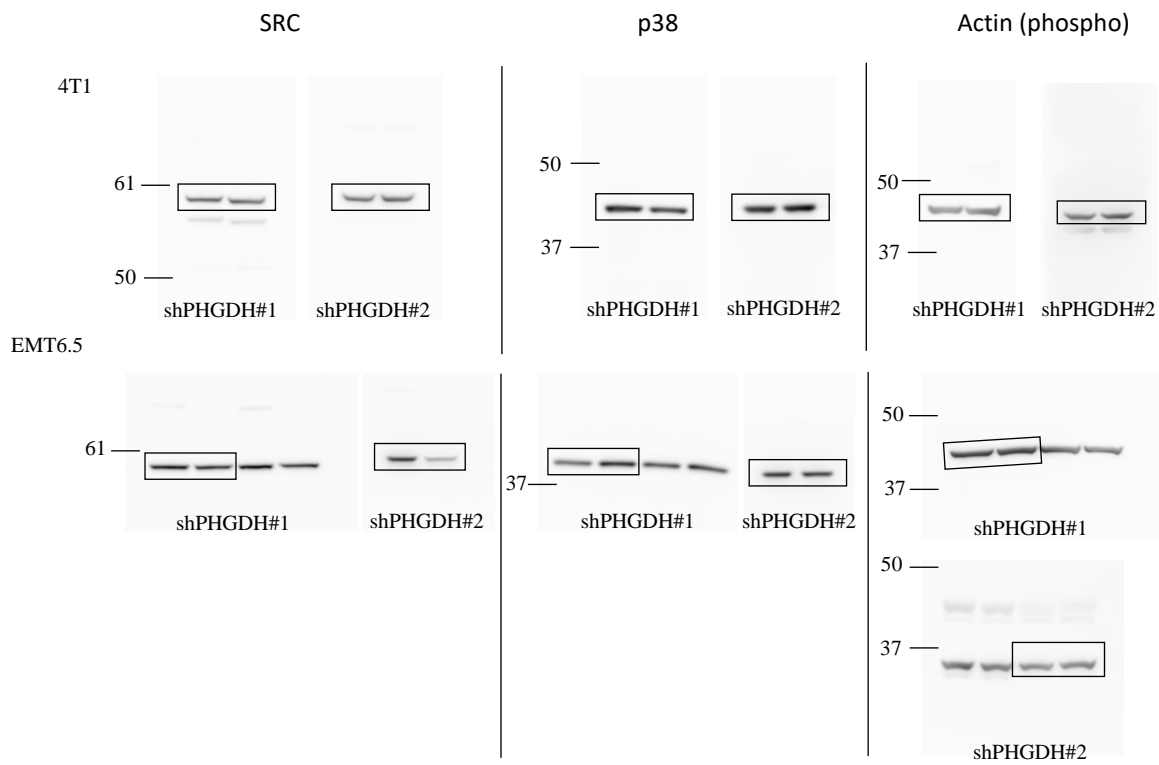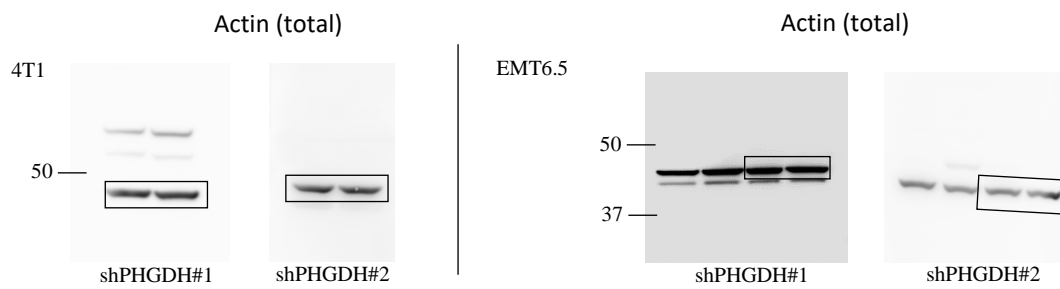

Extended Data Figure 4f

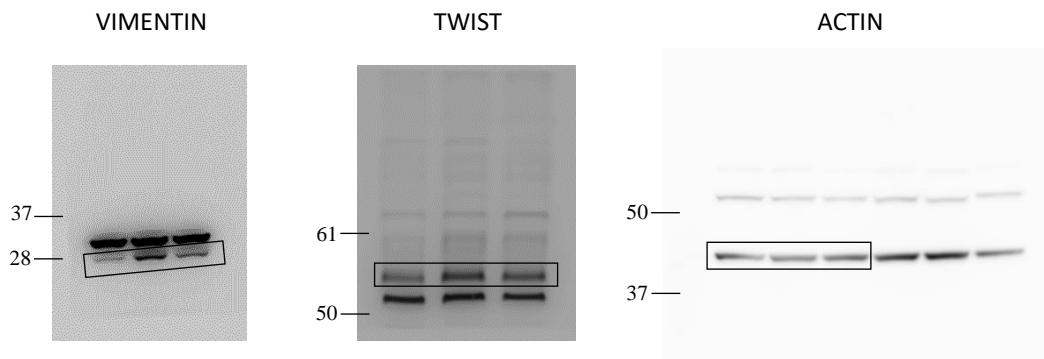

Extended Data Figure 4e

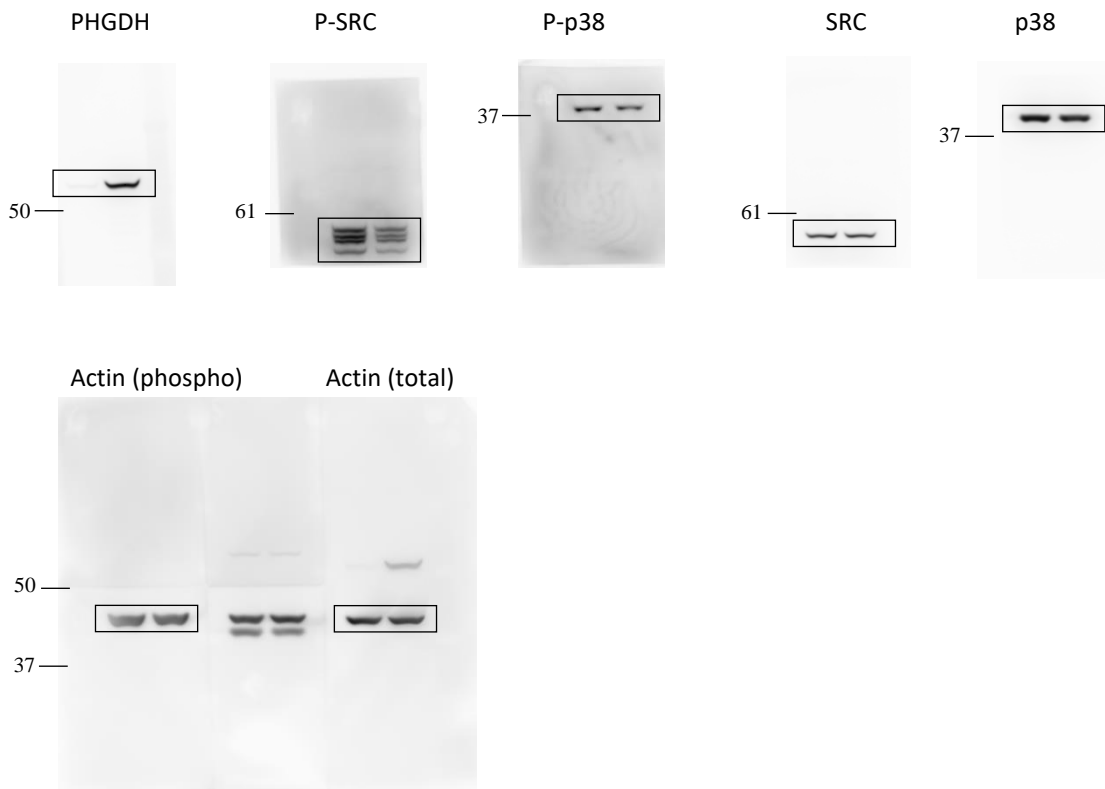

Upper image shows 6 parts of a membrane that were incubated separately but developed together in a single acquisition file.

Extended Data Figure 6h

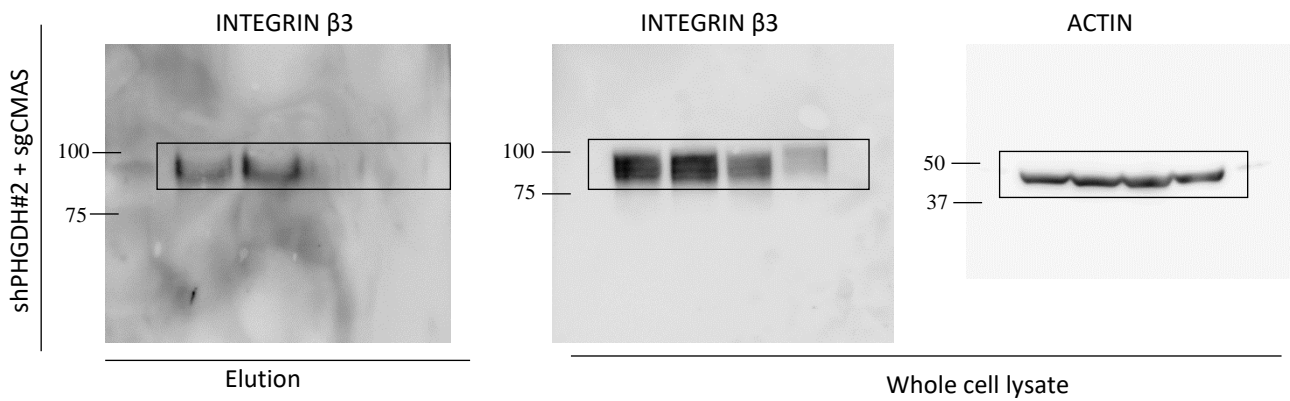

Extended Data Figure 8c

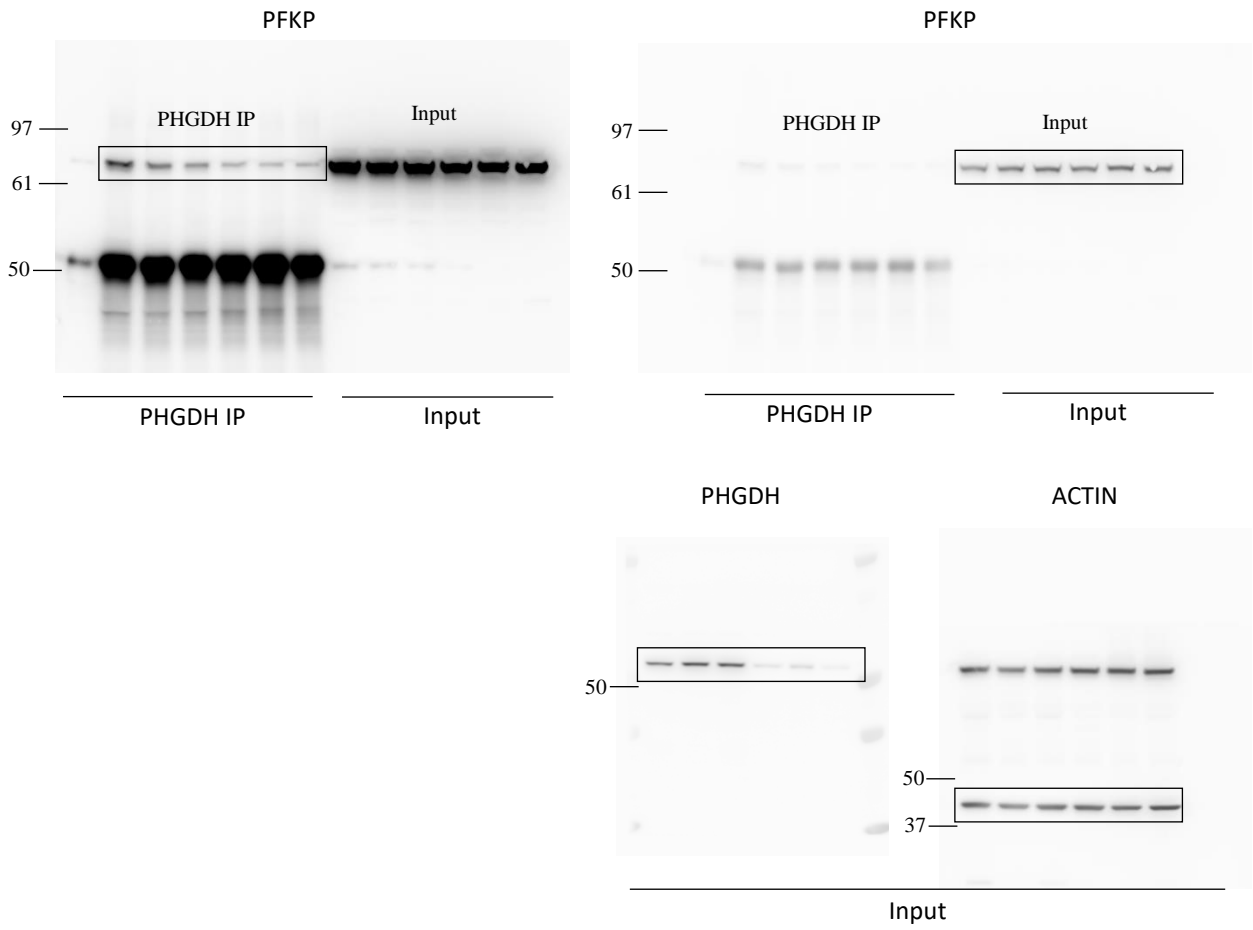

Extended Data Figure 8e

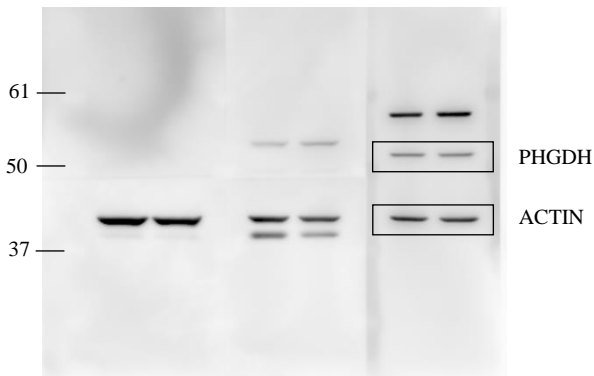

Upper image shows 6 parts of a membrane that were incubated separately but developed together in a single acquisition file.

Extended Data Figure 9d

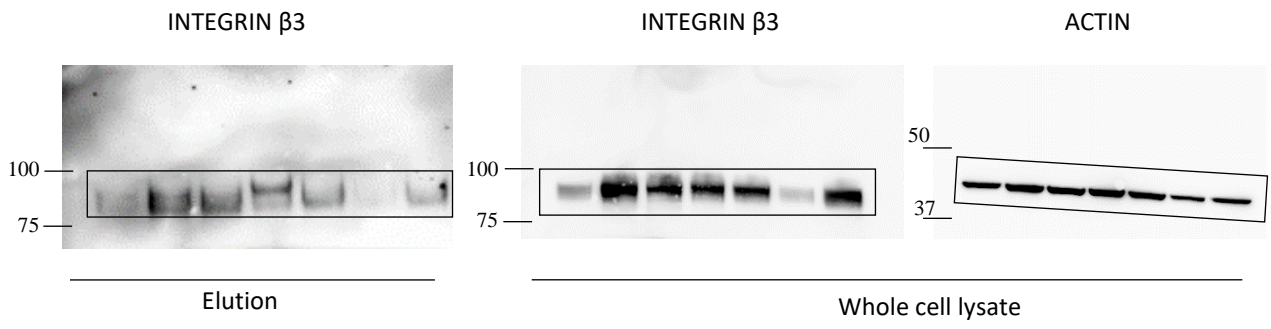

Extended Data Figure 10a

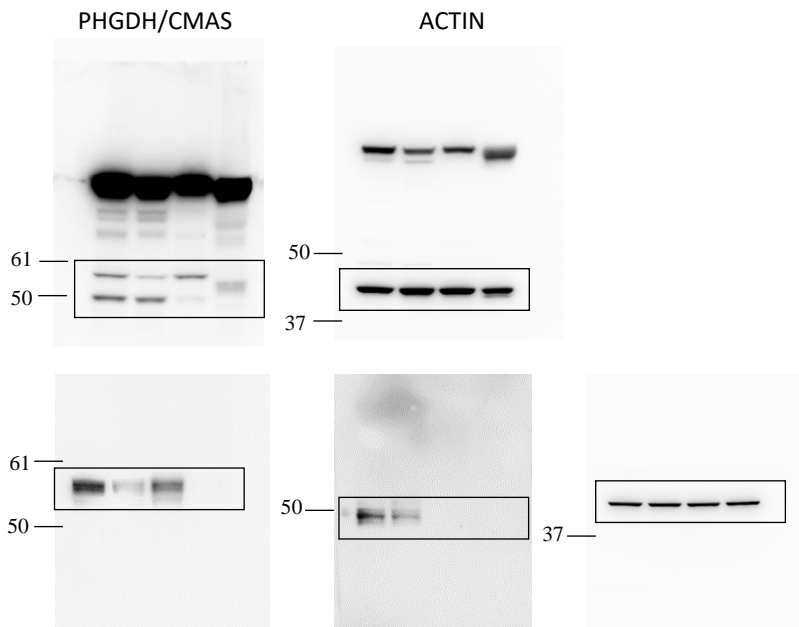

Extended Data Figure 10b

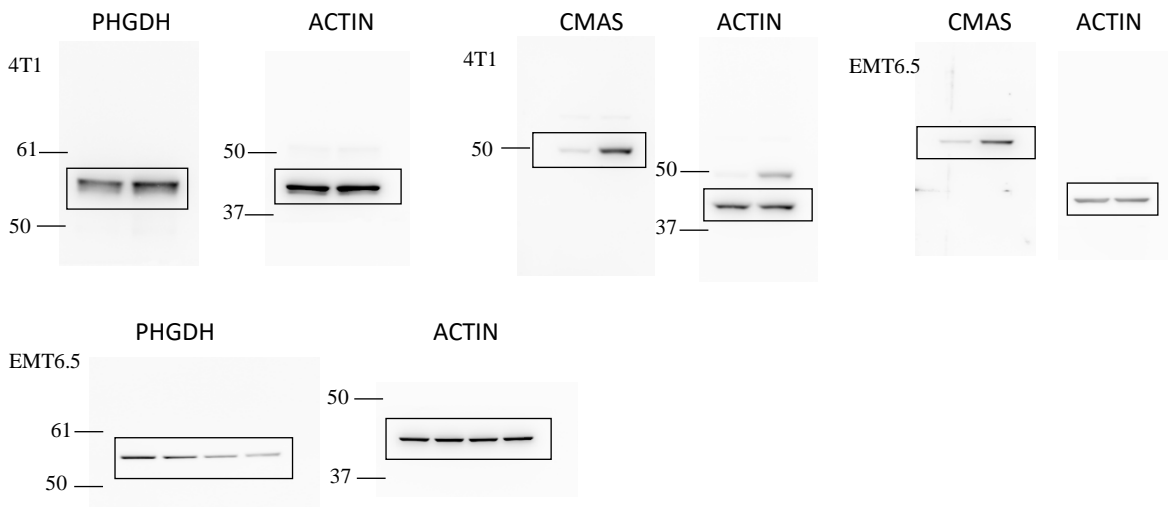

Extended Data Figure 10c

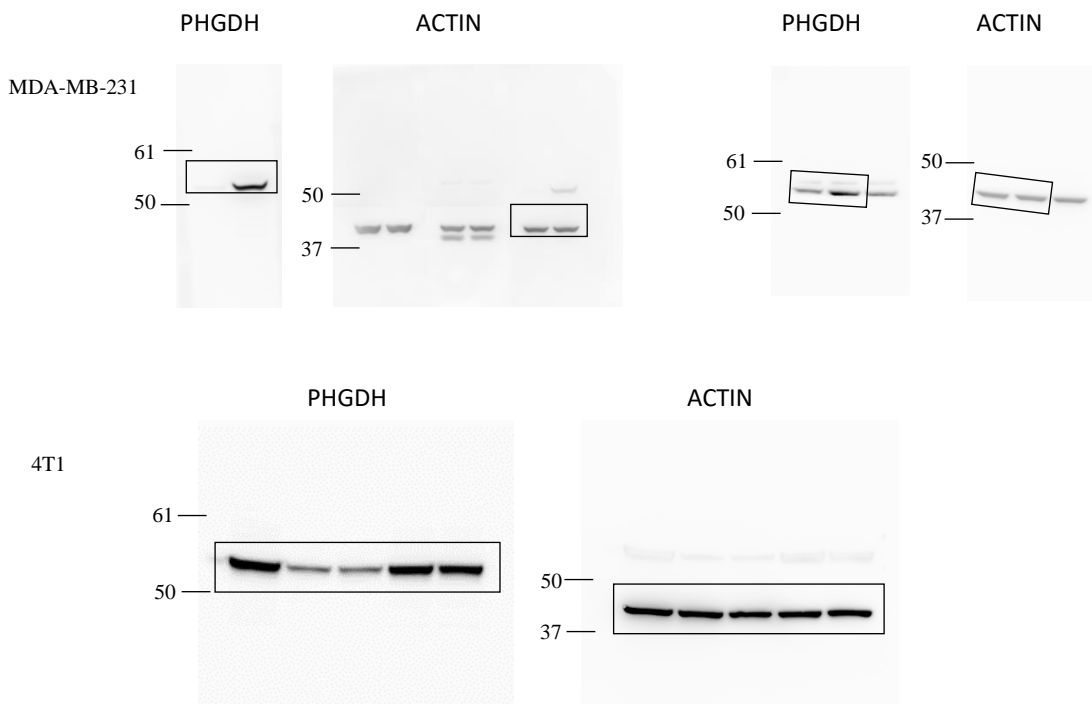

**Supplementary Figure 1.** Raw images of the western blot experiments presented in Figures 3, 4; Extended Data Figure 2, 4, 6, 8, 9 and 10. Pictures of exposed uncropped blots are shown together with information on the molecular mass ladder that was used.



Supplementary Figure 2: adjacent H&E for cropped areas

Fig. 1f  
poorly vascularized

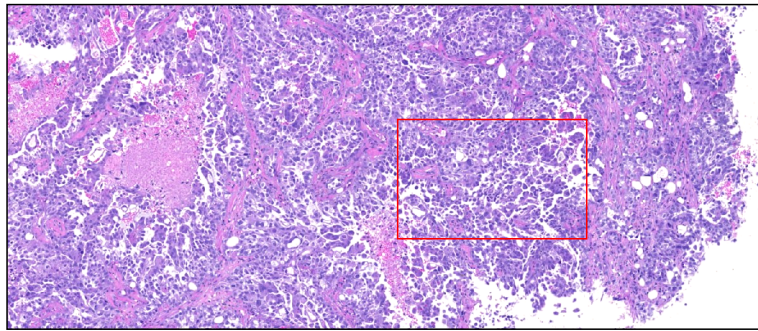

Fig. 1f  
highly vascularized

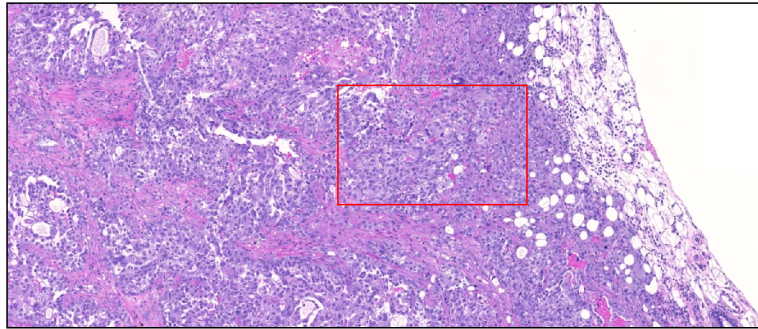

Ext Data Fig. 1j

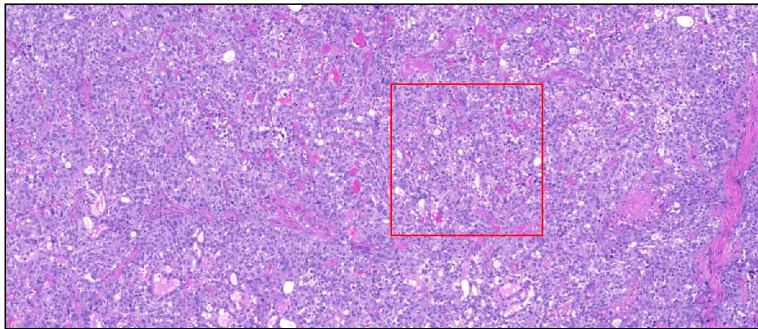

Ext.Data Fig.2h: areas from the same tumor, non-consecutive

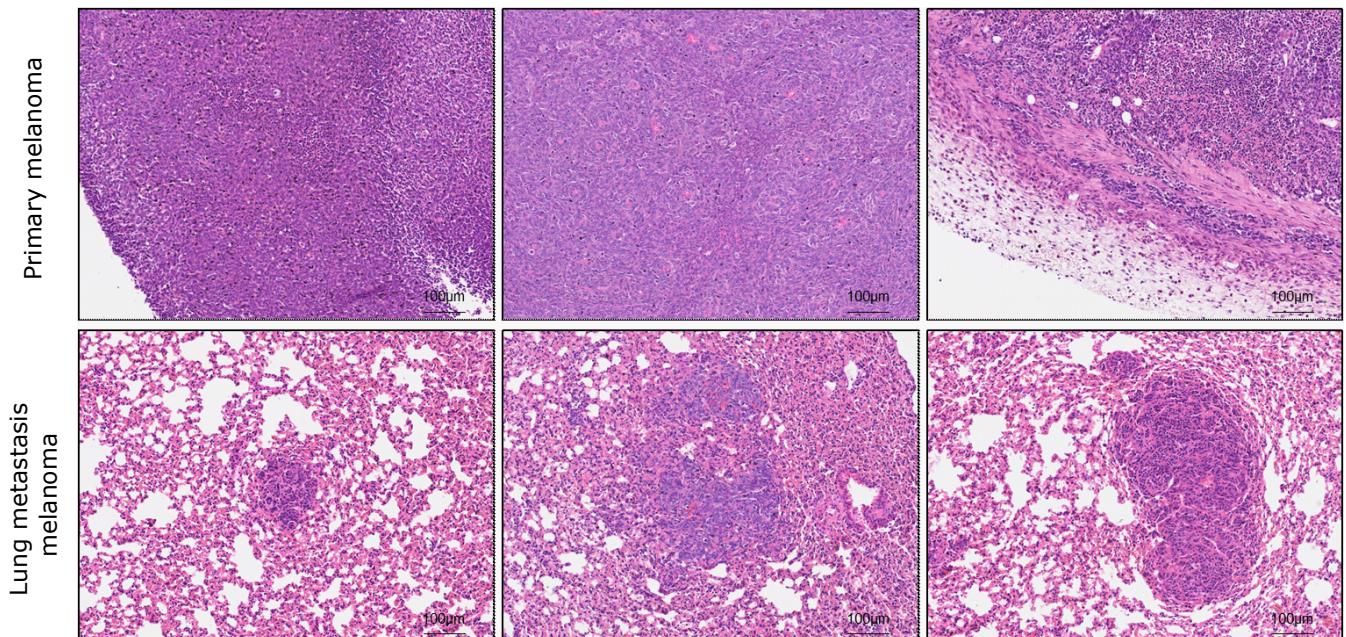

Ext Data Fig. 2j

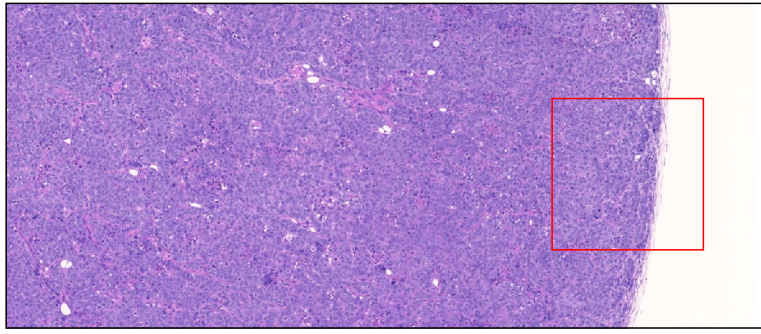

Ext Data Fig. 3e  
4T1 alone

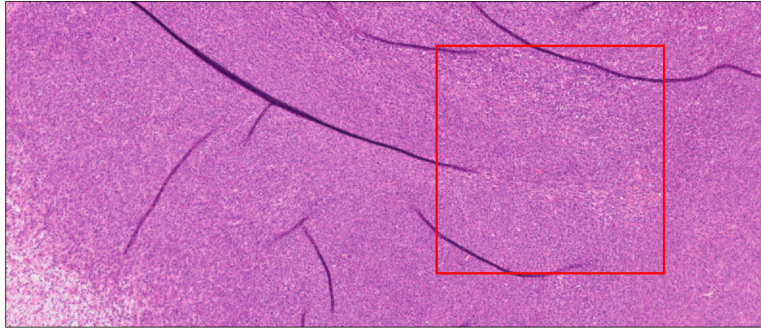

Ext Data Fig. 3e  
4T1-Ben3 co-injection

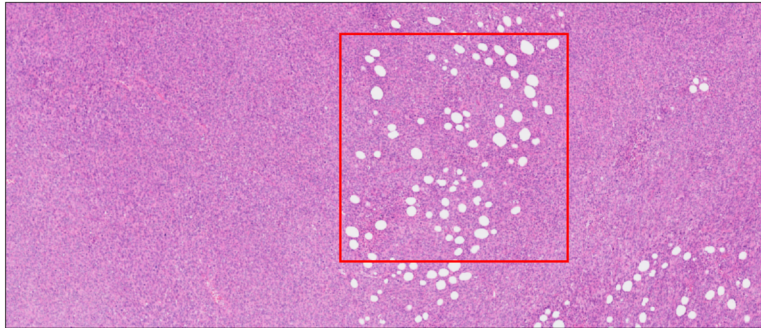

Ext Data Fig. 4g

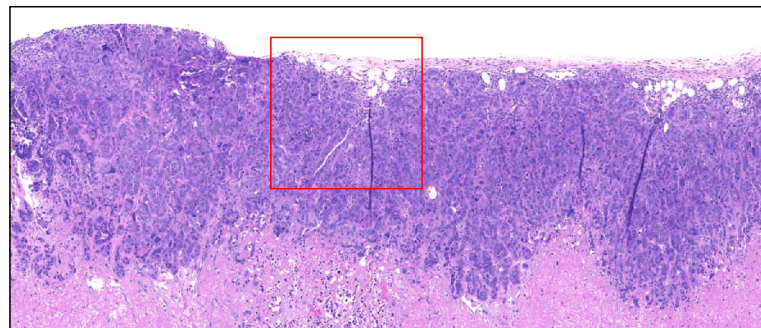

Ext Data Fig. 8d

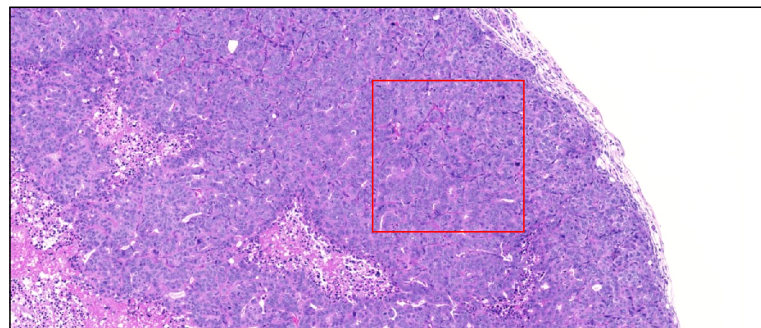

**Supplementary Figure 2.** Haematoxylin and eosin (H&E) staining images of adjacent areas of cropped images presented in Figures 1, Extended Data Figure 3, 4, and 8.

## Supplementary Figure 3: DNA staining

Ext Data Fig. 1i  
DNA staining

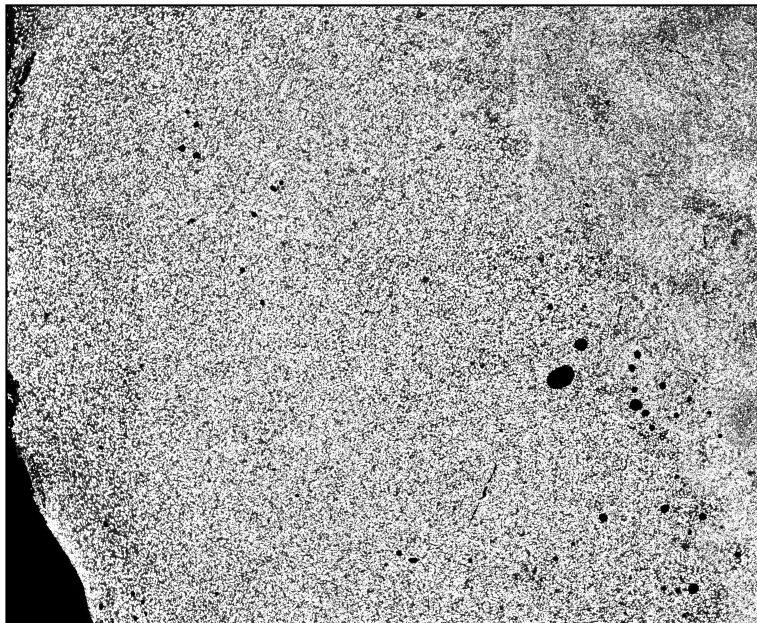

**Supplementary Figure 3.** DNA staining of adjacent area of cropped image presented in Extended Data Figure 1i.
